# Supplementary material for: Comprehensive RNA and protein functional assessments contribute to the clinical interpretation of MSH2 variants causing in-frame splicing alterations
Source: HighWire-hosted journal article supplement (doi:10.1136/jmg-2022-108576), 2022-09-16
Supplement: jmg-2022-108576supp004_data_supplement.pdf [file jmg-2022-108576supp004_data_supplement.pdf]

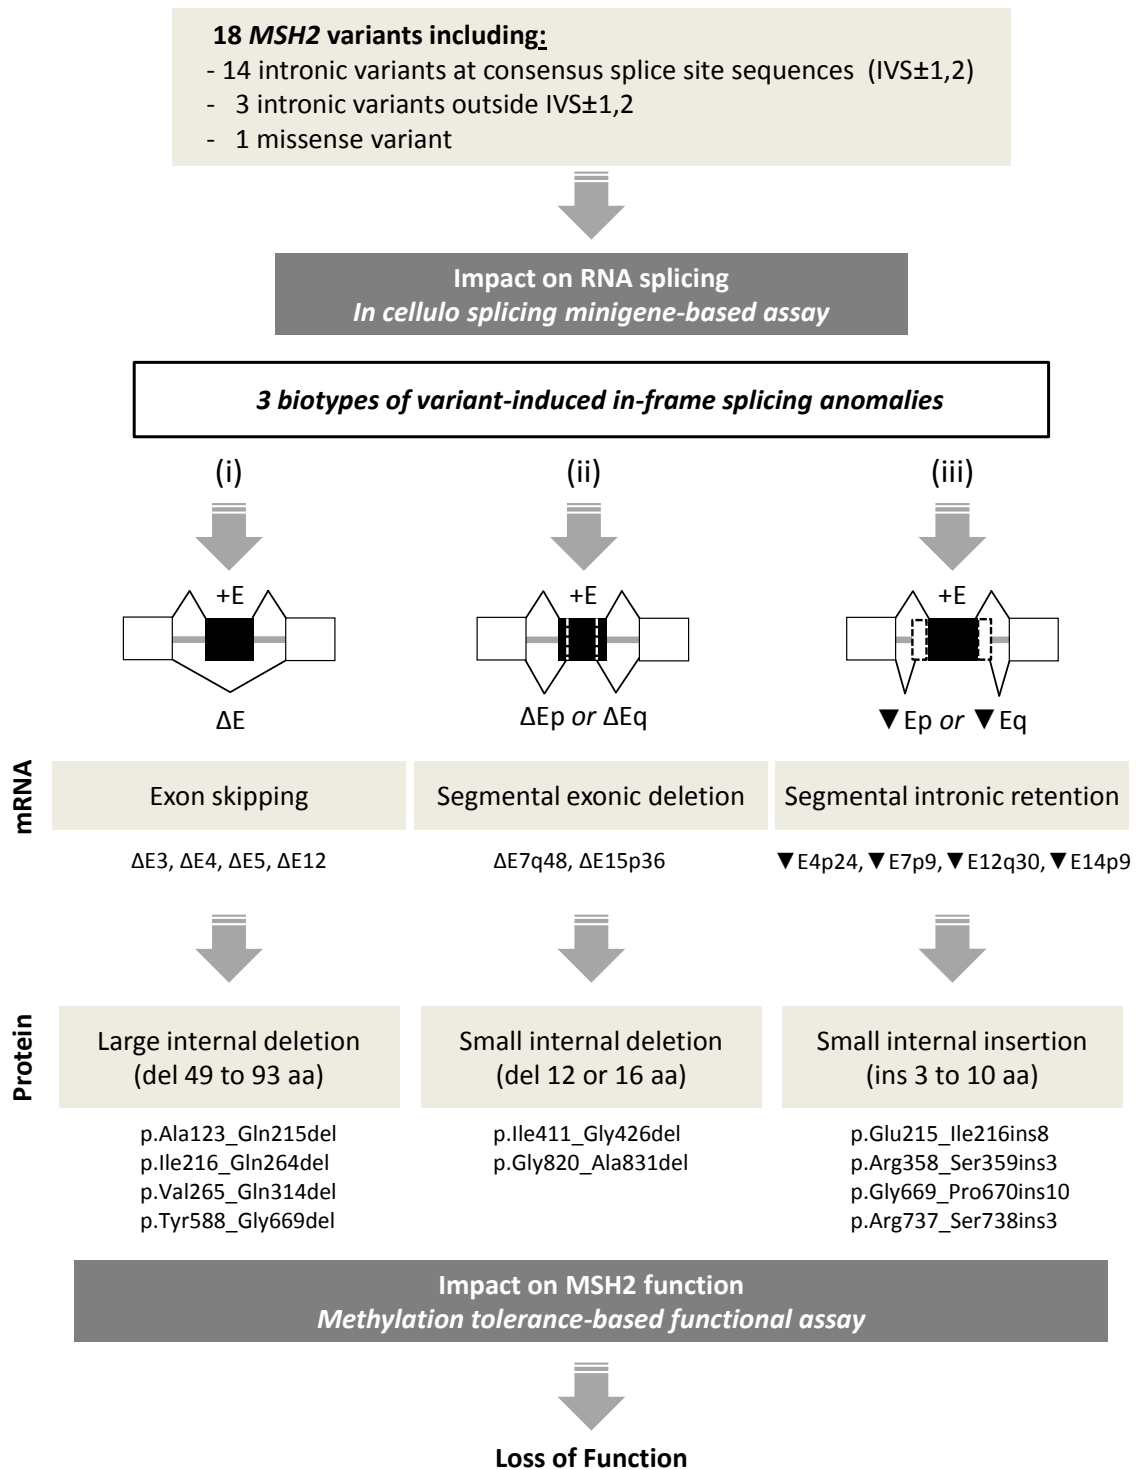

**Figure S2. Overview of the functional characterization of MSH2 variants resulting into in-frame splicing alterations**
